# Supplementary material
Source: ML conference proceedings conference paper supplement (https://openaccess.thecvf.com/content/CVPR_2019/html/Shugrina_Creative_Flow_Dataset_CVPR_2019_paper.html)
Supplement: Supplementary file 1 [file Shugrina_Creative_Flow_Dataset_CVPR_2019_supplemental.pdf]

Archive with 9 entries (6 files):
- 2596-supp/
- 2596-supp/.DS_Store
- __MACOSX/
- __MACOSX/2596-supp/
- __MACOSX/2596-supp/._.DS_Store
- 2596-supp/2596-supp.mp4
- __MACOSX/2596-supp/._2596-supp.mp4
- 2596-supp/2596-supp.pdf
- __MACOSX/2596-supp/._2596-supp.pdf
